# Supplementary material for: Human Co-Infections between Borrelia burgdorferi s.l. and Other Ixodes-Borne Microorganisms: A Systematic Review
Source: MDPI journal article supplement (doi:10.3390/pathogens11030282), 2022-02-23
Supplement: s1 [file s1]

Suppl. Table S2-A

|                                                                            | <b>Erythema Migrans</b>                                                                                                                                                                                                                                                                                                                                                                                                                                       | <b>Lyme Neuroborreliosis (LNB)</b>                                                                                                                                                                                                                                                                                                                                                                                                              | <b>Late LNB with Polyneuropathy</b>                                                                                                                                                                             |
|----------------------------------------------------------------------------|---------------------------------------------------------------------------------------------------------------------------------------------------------------------------------------------------------------------------------------------------------------------------------------------------------------------------------------------------------------------------------------------------------------------------------------------------------------|-------------------------------------------------------------------------------------------------------------------------------------------------------------------------------------------------------------------------------------------------------------------------------------------------------------------------------------------------------------------------------------------------------------------------------------------------|-----------------------------------------------------------------------------------------------------------------------------------------------------------------------------------------------------------------|
| <i>Source</i>                                                              | Adapted from Stanek et al., 2011                                                                                                                                                                                                                                                                                                                                                                                                                              | Adapted from Mygland et al., 2010 and Stanek et al., 2011                                                                                                                                                                                                                                                                                                                                                                                       | Adapted from Mygland et al., 2010 and Stanek et al., 2011                                                                                                                                                       |
| <b>Confirmed case</b>                                                      | <p><b>- Clinical criteria:</b></p> <p>- "typical erythema migrans" diagnosed by a clinician, i.e., Expanding red or bluish-red patch (<math>\geq</math> 5 cm in diameter), with or without central clearing.</p> <p>- or atypical erythema migrans</p> <p><b>- And <math>\geq</math>1 Laboratory Criterion for Diagnosis:</b></p> <p>i) Detection of <i>Borrelia burgdorferi</i> sl. by culture from skin biopsy</p> <p>ii) Positive PCR from skin biopsy</p> | <p><b>- Clinical criteria:</b> In adults mainly meningo-radiculitis, meningitis; rarely encephalitis, myelitis; very rarely cerebral vasculitis. In children mainly meningitis and facial palsy. Without other obvious reasons.</p> <p><b>- And 2 Laboratory Criteria for Diagnosis:</b></p> <p>i) Cerebrospinal fluid pleocytosis</p> <p>ii) demonstration of intrathecal specific antibody synthesis or positive PCR from CSF (early LNB)</p> | <p><b>- Clinical criteria:</b> peripheral neuropathy and acrodermatitis chronica atrophicans</p> <p><b>- And 1 Laboratory Criterion for Diagnosis:</b></p> <p>i) High level of specific antibodies in serum</p> |
| <b>Laboratory-confirmed case without or with unknown clinical criteria</b> | NA                                                                                                                                                                                                                                                                                                                                                                                                                                                            | NA                                                                                                                                                                                                                                                                                                                                                                                                                                              | NA                                                                                                                                                                                                              |
| <b>Probable case</b>                                                       | <p><b>- Clinical criteria:</b> typical erythema migrans diagnosed by a clinician</p> <p><b>- Without Laboratory Criterion for Diagnosis</b></p>                                                                                                                                                                                                                                                                                                               |                                                                                                                                                                                                                                                                                                                                                                                                                                                 |                                                                                                                                                                                                                 |
| <b>Possible case</b>                                                       | <p><b>- Clinical criteria:</b> non-typical erythema migrans diagnosed by a clinician or compatible lesion reported by a patient after a tick bite</p> <p><b>- And <math>\geq</math>1 Laboratory Criterion for Diagnosis:</b></p> <p>i) Sero-conversion or x4 increase of specific antibodies in paired serum samples</p> <p>ii) Elevated IgG or IgM titers</p>                                                                                                | <p><b>- Clinical criteria</b></p> <p><b>- And 1 Laboratory Criterion for Diagnosis:</b></p> <p>i) Cerebrospinal fluid pleocytosis</p> <p>ii) demonstration of intrathecal specific antibody synthesis or positive PCR from CSF (early LNB)</p> <p><b>- After a duration of evolution <math>\geq</math> 6 weeks, there have to be found specific IgG antibodies in the serum</b></p>                                                             |                                                                                                                                                                                                                 |
| <b>Undefinable</b>                                                         |                                                                                                                                                                                                                                                                                                                                                                                                                                                               | <p><b>- Clinical criteria</b></p> <p><b>- With or without supportive serology result:</b> Specific serum IgG antibodies</p> <p><b>- Without Laboratory Analysis conducted from CSF</b></p>                                                                                                                                                                                                                                                      |                                                                                                                                                                                                                 |
| <b>Unlikely case</b>                                                       |                                                                                                                                                                                                                                                                                                                                                                                                                                                               | <p><b>- Non-matching clinical criteria</b></p> <p><b>- Laboratory Analysis conducted from CSF:</b> Absence or doubtful</p>                                                                                                                                                                                                                                                                                                                      |                                                                                                                                                                                                                 |
| <b>Isolated positive serology</b>                                          | NA                                                                                                                                                                                                                                                                                                                                                                                                                                                            | NA                                                                                                                                                                                                                                                                                                                                                                                                                                              | NA                                                                                                                                                                                                              |

Suppl. Table S2-B

|                                                                            | <b>Lyme Arthritis</b>                                                                                                                                                                                                                                                                                                                                                                                                                                                                                             | <b>Acrodermatitis Chronica Atrophicans (ACA)</b>                                                                                                                                                                                                                                                                                                                                                                                                                                                                                                                            | <b>Lyme Carditis</b>                                                                                                                                                                                                                                                                                                                                                                                                             |
|----------------------------------------------------------------------------|-------------------------------------------------------------------------------------------------------------------------------------------------------------------------------------------------------------------------------------------------------------------------------------------------------------------------------------------------------------------------------------------------------------------------------------------------------------------------------------------------------------------|-----------------------------------------------------------------------------------------------------------------------------------------------------------------------------------------------------------------------------------------------------------------------------------------------------------------------------------------------------------------------------------------------------------------------------------------------------------------------------------------------------------------------------------------------------------------------------|----------------------------------------------------------------------------------------------------------------------------------------------------------------------------------------------------------------------------------------------------------------------------------------------------------------------------------------------------------------------------------------------------------------------------------|
| <i>Source</i>                                                              | Adapted from Stanek et al., 2011                                                                                                                                                                                                                                                                                                                                                                                                                                                                                  | Adapted from Stanek et al., 2011                                                                                                                                                                                                                                                                                                                                                                                                                                                                                                                                            | Adapted from Stanek et al., 2011                                                                                                                                                                                                                                                                                                                                                                                                 |
| <b>Confirmed case</b>                                                      | <p>- <b>Clinical criteria:</b> Recurrent attacks or persisting objective joint swelling in one or a few large joints diagnosed by a clinician. Alternative explanations must be excluded.</p> <p>- <b>And <math>\geq 1</math> Laboratory Criterion for Diagnosis:</b></p> <p>i) Detection of <i>Borrelia burgdorferi</i> sl. by culture from synovial fluid and/or tissue</p> <p>ii) Positive PCR from synovial fluid and/or tissue</p> <p>iii) Specific serum IgG antibodies, usually in high concentrations</p> | <p>- <b>Clinical criteria:</b> "typical ACA" diagnosed by a clinician, i.e., Long-standing red or bluish-red lesions, usually on the extensor surfaces of extremities. Initial doughy swelling. Lesions eventually become atrophic. Possible skin induration and fibroid nodules over bony prominences.</p> <p>- <b>And <math>\geq 1</math> Laboratory Criterion for Diagnosis:</b></p> <p>i) Detection of <i>Borrelia burgdorferi</i> sl. by culture from skin biopsy</p> <p>ii) Positive PCR from skin biopsy</p> <p>iii) High level of specific serum IgG antibodies</p> | <p>- <b>Clinical criteria:</b> Acute onset of atrio-ventricular (I–III) conduction disturbances, rhythm disturbances, sometimes myocarditis or pancarditis. Alternative explanations must be excluded.</p> <p>- <b>And <math>\geq 1</math> Laboratory Criterion for Diagnosis:</b></p> <p>i) Detection of <i>B. burgdorferi</i> sl. by culture from endomyocardial biopsy</p> <p>ii) Positive PCR from endomyocardial biopsy</p> |
| <b>Laboratory-confirmed case without or with unknown clinical criteria</b> | NA                                                                                                                                                                                                                                                                                                                                                                                                                                                                                                                | NA                                                                                                                                                                                                                                                                                                                                                                                                                                                                                                                                                                          | NA                                                                                                                                                                                                                                                                                                                                                                                                                               |
| <b>Probable case</b>                                                       |                                                                                                                                                                                                                                                                                                                                                                                                                                                                                                                   |                                                                                                                                                                                                                                                                                                                                                                                                                                                                                                                                                                             | <p>- <b>Clinical criteria:</b> Acute onset of atrio-ventricular (I–III) conduction disturbances, rhythm disturbances, sometimes myocarditis or pancarditis. Alternative explanations must be excluded.</p> <p>- <b>Recent or concomitant erythema migrans and/or neurologic disorders.</b></p> <p>- <b>And 1 supportive serology result:</b> Specific serum IgG antibodies</p>                                                   |
| <b>Possible case</b>                                                       | <p>- <b>Clinical criteria:</b> compatible clinical case</p> <p>- <b>And 1 supportive serology result:</b> Specific serum IgG antibodies, usually in high concentrations</p>                                                                                                                                                                                                                                                                                                                                       | <p>- <b>Clinical criteria:</b> "typical ACA" diagnosed by a clinician</p> <p>- <b>Without Laboratory Criterion for Diagnosis or</b></p> <p>- <b>Clinical criteria:</b> compatible clinical case</p> <p>- <b>And 1 supportive serology result:</b> High level of specific serum IgG antibodies</p>                                                                                                                                                                                                                                                                           | <p>- <b>Clinical criteria:</b> Acute onset of atrio-ventricular (I–III) conduction disturbances, rhythm disturbances, sometimes myocarditis or pancarditis.</p> <p>- <b>Possible other alternative explanations</b></p> <p>- <b>And 1 supportive serology result:</b> Specific serum IgG antibodies</p>                                                                                                                          |
| <b>Undefinable</b>                                                         | - <b>Clinical criteria:</b> Recurrent attacks or persisting objective joint swelling in one or a few large joints                                                                                                                                                                                                                                                                                                                                                                                                 |                                                                                                                                                                                                                                                                                                                                                                                                                                                                                                                                                                             |                                                                                                                                                                                                                                                                                                                                                                                                                                  |

|                            |                                                                                                                 |                                                                   |    |
|----------------------------|-----------------------------------------------------------------------------------------------------------------|-------------------------------------------------------------------|----|
|                            | diagnosed by a clinician. Alternative explanations must be excluded.<br>- Without Laboratory Analysis conducted |                                                                   |    |
| Unlikely case              | Absence of specific IgG in serum                                                                                | Incompatible clinical case<br>or Absence of specific IgG in serum |    |
| Isolated positive serology | NA                                                                                                              | NA                                                                | NA |

Suppl. Table S2-C

|                                                                            | <b>Human Granulocytic Anaplasmosis</b>                                                                                                                                                                                                                                                                                                                                                                                                                                                                                                                                                                                                                                           | <b>Rickettsiosis</b>                                                                                                                                                                                                                                                                                                                                                                                    | <b>Human Babesiosis</b>                                                                                                                                                                                                                                                                                                                                                                                                                                                                                                                                                                                                                                                                                           | <b>Neoehrlichiosis</b>                                                                                                                                        |
|----------------------------------------------------------------------------|----------------------------------------------------------------------------------------------------------------------------------------------------------------------------------------------------------------------------------------------------------------------------------------------------------------------------------------------------------------------------------------------------------------------------------------------------------------------------------------------------------------------------------------------------------------------------------------------------------------------------------------------------------------------------------|---------------------------------------------------------------------------------------------------------------------------------------------------------------------------------------------------------------------------------------------------------------------------------------------------------------------------------------------------------------------------------------------------------|-------------------------------------------------------------------------------------------------------------------------------------------------------------------------------------------------------------------------------------------------------------------------------------------------------------------------------------------------------------------------------------------------------------------------------------------------------------------------------------------------------------------------------------------------------------------------------------------------------------------------------------------------------------------------------------------------------------------|---------------------------------------------------------------------------------------------------------------------------------------------------------------|
| <i>Source</i>                                                              | Adapted from Dahlgren et al., 2015                                                                                                                                                                                                                                                                                                                                                                                                                                                                                                                                                                                                                                               | Adapted from Portillo et al., 2017                                                                                                                                                                                                                                                                                                                                                                      | Adapted from Krause et al., 2021                                                                                                                                                                                                                                                                                                                                                                                                                                                                                                                                                                                                                                                                                  | <i>This study</i>                                                                                                                                             |
| <b>Confirmed case</b>                                                      | <p>- <b>Clinical criteria:</b> fever and at least one of the following symptoms: headache, myalgia, malaise, anemia, leukopenia, thrombocytopenia, or elevated hepatic transaminases.</p> <p>- <b>And <math>\geq 1</math> Laboratory Criterion for Diagnosis:</b></p> <p>i) <math>\times 4</math> or greater increase in IgG titer by IFA between paired serum samples (acute serum taken during first week of illness and convalescent sample taken 2–4 weeks later)</p> <p>ii) Detection of DNA by PCR in blood</p> <p>iii) Demonstration of antigen in a biopsy or autopsy by immunohistochemical (IHC) methods</p> <p>iv) Isolation by culture from a clinical specimen.</p> | <p>- <b>Clinical criteria:</b> fever, rash, and eschar with different combinations</p> <p>- <b>And <math>\geq 1</math> Laboratory Criterion for Diagnosis:</b></p> <p>i) positive PCR and/or culture in blood or skin biopsy</p> <p>ii) positive immunohistochemical assays in tissues</p> <p>iii) Sero-conversion or <math>\times 4</math> increase of specific antibodies in paired serum samples</p> | <p>- <b>Epidemiological risk factors</b></p> <p>- <b>Clinical criteria:</b> typical symptoms (fever, fatigue, chills, sweats, headache, and anorexia) and characteristic routine laboratory test abnormalities (anemia, thrombocytopenia, elevated liver enzymes, and/or evidence of intravascular hemolysis (LDH <math>\uparrow</math>, Bilirubin <math>\uparrow</math>, haptoglobin <math>\downarrow</math>))</p> <p>- <b>And <math>\geq 1</math> Laboratory Criterion for Diagnosis:</b></p> <p>i) positive PCR in blood</p> <p>ii) intraerythrocytic <i>Babesia</i> parasites on blood smear</p> <p>iii) Sero-conversion or <math>\times 4</math> increase of specific antibodies in paired serum samples</p> | <p>- <b>Clinical criteria:</b> Flu-like syndrome and/or thrombosis</p> <p>- <b>And Laboratory Criterion for Diagnosis</b></p> <p>i) positive PCR in blood</p> |
| <b>Laboratory-confirmed case without or with unknown clinical criteria</b> | <b><math>\geq 1</math> Laboratory Criterion for Diagnosis without or with unknown clinical criteria</b>                                                                                                                                                                                                                                                                                                                                                                                                                                                                                                                                                                          | <b><math>\geq 1</math> Laboratory Criterion for Diagnosis without or with unknown clinical criteria</b>                                                                                                                                                                                                                                                                                                 | <b><math>\geq 1</math> Laboratory Criterion for Diagnosis without or with unknown clinical criteria</b>                                                                                                                                                                                                                                                                                                                                                                                                                                                                                                                                                                                                           | <b>Laboratory Criterion for Diagnosis without or with unknown clinical criteria</b>                                                                           |
| <b>Probable case</b>                                                       | <p>- <b>Clinical criteria</b></p> <p>- <b>And 1 supportive result:</b></p> <p>i) Elevated IgG or IgM titers</p> <p>ii) Presence of morulae in the cytoplasm of neutrophils or eosinophils.</p>                                                                                                                                                                                                                                                                                                                                                                                                                                                                                   | <p>- <b>Clinical criteria</b></p> <p>- <b>And 1 supportive result:</b></p> <p>i) Elevated IgG and IgM titers</p>                                                                                                                                                                                                                                                                                        | <p>- <b>Epidemiological risk factors</b></p> <p>- <b>Clinical criteria</b></p> <p>- <b>And 1 supportive serology result:</b></p> <p>i) Elevated titer of specific serum IgG <math>&gt;1/1024</math></p> <p>ii) Elevated titer of specific serum IgM</p>                                                                                                                                                                                                                                                                                                                                                                                                                                                           |                                                                                                                                                               |
| <b>Possible case</b>                                                       |                                                                                                                                                                                                                                                                                                                                                                                                                                                                                                                                                                                                                                                                                  | <p>- <b>Clinical criteria</b></p> <p>- <b>And 1 supportive result:</b></p> <p>i) Elevated IgG or IgM titers</p>                                                                                                                                                                                                                                                                                         | <p>- <b>Epidemiological risk factors</b></p> <p>- <b>Clinical criteria</b></p> <p>- <b>And 1 supportive serology result:</b></p> <p>i) Elevated titer of specific serum IgG <math>&lt;1/1024</math></p>                                                                                                                                                                                                                                                                                                                                                                                                                                                                                                           |                                                                                                                                                               |
| <b>Undefinable</b>                                                         | <b>Positive PCR from other biological samples</b>                                                                                                                                                                                                                                                                                                                                                                                                                                                                                                                                                                                                                                | <b>Positive PCR from other biological samples</b>                                                                                                                                                                                                                                                                                                                                                       | <b>Positive PCR from other biological samples</b>                                                                                                                                                                                                                                                                                                                                                                                                                                                                                                                                                                                                                                                                 | <b>Positive PCR from other biological samples</b>                                                                                                             |

|                            |                                                                       |                                                                       |                                                                       |                                                                       |
|----------------------------|-----------------------------------------------------------------------|-----------------------------------------------------------------------|-----------------------------------------------------------------------|-----------------------------------------------------------------------|
| Unlikely case              |                                                                       |                                                                       |                                                                       |                                                                       |
| Isolated positive serology | Elevated titer of specific serum antibodies without clinical criteria | Elevated titer of specific serum antibodies without clinical criteria | Elevated titer of specific serum antibodies without clinical criteria | Elevated titer of specific serum antibodies without clinical criteria |

Suppl. Table S2-D

|                                                                            | <b><i>B. miyamotoi</i> Disease</b>                                                                                                                                                                                                                | <b>Bartonellosis</b>                                                                                                                                                                                                                                                                                                                 | <b>Tick-Borne Encephalitis</b>                                                                                                                                                                                                                                                                                                                                                                                                                                                                                                                              | <b>Powassan Encephalitis</b>                                                                                                                                                                                                                                                                                                                                                                                                                                                                                                                                                                                                                                                                                                                                                                                                                                              |
|----------------------------------------------------------------------------|---------------------------------------------------------------------------------------------------------------------------------------------------------------------------------------------------------------------------------------------------|--------------------------------------------------------------------------------------------------------------------------------------------------------------------------------------------------------------------------------------------------------------------------------------------------------------------------------------|-------------------------------------------------------------------------------------------------------------------------------------------------------------------------------------------------------------------------------------------------------------------------------------------------------------------------------------------------------------------------------------------------------------------------------------------------------------------------------------------------------------------------------------------------------------|---------------------------------------------------------------------------------------------------------------------------------------------------------------------------------------------------------------------------------------------------------------------------------------------------------------------------------------------------------------------------------------------------------------------------------------------------------------------------------------------------------------------------------------------------------------------------------------------------------------------------------------------------------------------------------------------------------------------------------------------------------------------------------------------------------------------------------------------------------------------------|
| <i>Source</i>                                                              | <i>This study</i>                                                                                                                                                                                                                                 | <i>This study</i>                                                                                                                                                                                                                                                                                                                    | Adapted from EU 2012                                                                                                                                                                                                                                                                                                                                                                                                                                                                                                                                        | Adapted from CDC 2001                                                                                                                                                                                                                                                                                                                                                                                                                                                                                                                                                                                                                                                                                                                                                                                                                                                     |
| <b>Confirmed case</b>                                                      | <p>- <b>Clinical criteria:</b> Flu-like syndrome and/or meningoencephalitis</p> <p>- <b>And 1 Laboratory Criterion for Diagnosis</b></p> <p>i) positive PCR in blood (flu-like syndrome)</p> <p>ii) positive PCR in CSF (meningoencephalitis)</p> | <p>- <b>Clinical criteria:</b> Flu-like syndrome with fever, splenomegaly, lymphadenopathy, or infective endocarditis or encephalitis or neuroretinitis</p> <p>- <b>And <math>\geq 1</math> Laboratory Criterion for Diagnosis:</b></p> <p>i) positive PCR in blood or tissues</p> <p>ii) positive culture from blood or tissues</p> | <p>- <b>Clinical criteria:</b> inflammation of the CNS (e.g. meningitis, meningo-encephalitis, encephalo- myelitis, encephaloradiculitis)</p> <p>- <b>And <math>\geq 1</math> Laboratory Criterion for Diagnosis:</b></p> <p>i) TBE specific IgM AND IgG antibodies in blood</p> <p>ii) TBE specific IgM antibodies in CSF</p> <p>iii) Sero-conversion or x4 increase of TBE-specific antibodies in paired serum samples</p> <p>iv) Detection of TBE viral nucleic acid in a clinical specimen,</p> <p>v) Isolation of TBE virus from clinical specimen</p> | <p>- <b>Clinical criteria:</b> fever <math>&gt;38^{\circ}\text{C}</math> with any peripheral of CNS dysfunction</p> <p>- <b>And <math>\geq 1</math> Laboratory Criterion for Diagnosis:</b></p> <p>i) x4 or greater change in virus-specific serum antibody titer</p> <p>ii) Isolation of virus from or demonstration of specific viral antigen or genomic sequences in tissue, blood, cerebrospinal fluid (CSF), or other body fluid</p> <p>iii) Virus-specific immunoglobulin M (IgM) antibodies demonstrated in CSF by antibody-capture enzyme immunoassay (EIA)</p> <p>iv) Virus-specific IgM antibodies demonstrated in serum by antibody-capture EIA and confirmed by demonstration of virus-specific serum immunoglobulin G (IgG) antibodies in the same or a later specimen by another serologic assay (e.g., neutralization or hemagglutination inhibition).</p> |
| <b>Laboratory-confirmed case without or with unknown clinical criteria</b> | <b>Laboratory Criterion for Diagnosis without or with unknown clinical criteria</b>                                                                                                                                                               | <b><math>\geq 1</math> Laboratory Criterion for Diagnosis without or with unknown clinical criteria</b>                                                                                                                                                                                                                              | <b><math>\geq 1</math> Laboratory Criterion for Diagnosis without or with unknown clinical criteria</b>                                                                                                                                                                                                                                                                                                                                                                                                                                                     | <b><math>\geq 1</math> Laboratory Criterion for Diagnosis without or with unknown clinical criteria</b>                                                                                                                                                                                                                                                                                                                                                                                                                                                                                                                                                                                                                                                                                                                                                                   |
| <b>Probable case</b>                                                       | <p>- <b>Clinical criteria:</b> Flu-like syndrome</p> <p>- <b>And 1 supportive serology result:</b></p> <p>i) Sero-conversion or x4 increase of specific antibodies in paired serum samples</p>                                                    | <p>- <b>Clinical criteria</b></p> <p>- <b>And 1 supportive serology result:</b></p> <p>i) Sero-conversion or x4 increase of specific antibodies in paired serum samples</p>                                                                                                                                                          | <p>- <b>Clinical criteria</b></p> <p>- <b>And 1 supportive serology result:</b></p> <p>i) Detection of TBE-specific IgM-antibodies in a unique serum sample</p>                                                                                                                                                                                                                                                                                                                                                                                             | <p>- <b>Clinical criteria</b></p> <p>- <b>And 1 supportive serology result:</b></p> <p>i) a single or stable (less than or equal to twofold change) but elevated titer of virus-specific serum antibodies</p> <p>ii) serum IgM antibodies detected by antibody-capture EIA but with no available results of a confirmatory test for virus-specific serum IgG antibodies in the same or a later specimen.</p>                                                                                                                                                                                                                                                                                                                                                                                                                                                              |

|                                   |                                                                                                                                               |                                                                                                                            |                                                                       |                                                                       |
|-----------------------------------|-----------------------------------------------------------------------------------------------------------------------------------------------|----------------------------------------------------------------------------------------------------------------------------|-----------------------------------------------------------------------|-----------------------------------------------------------------------|
| <b>Possible case</b>              | <b>- Clinical criteria:</b> Flu-like syndrome<br><b>- And 1 consistent serology result:</b><br>i) Elevated titer of specific serum antibodies | <b>- Clinical criteria</b><br><b>- And 1 consistent serology result:</b><br>i) Elevated titer of specific serum antibodies |                                                                       |                                                                       |
| <b>Undefinable</b>                |                                                                                                                                               |                                                                                                                            |                                                                       |                                                                       |
| <b>Unlikely case</b>              |                                                                                                                                               |                                                                                                                            |                                                                       |                                                                       |
| <b>Isolated positive serology</b> | Elevated titer of specific serum antibodies without clinical criteria                                                                         | Elevated titer of specific serum antibodies without clinical criteria                                                      | Elevated titer of specific serum antibodies without clinical criteria | Elevated titer of specific serum antibodies without clinical criteria |
